# Supplementary material
Source: PubMed Central journal article supplement (PMC5985144)

of kymograph traces of VEGF-stimulated cells under DMSO vs CCG-1423 (5 M) treatment. **C)** Representative immunoblots of HmVEC extracts for VASP, ArpC2, Pfn1, and GAPDH (loading control) at various concentrations of CCG-1423 treatment (the numbers indicate the expression level relative to DMSO control averaged from 2 independent experiments). HmVEC lysates were prepared at the same time-point as the end-point cord formation or cell motility assay.

**Figure 4. Pfn1 depletion inhibits angiogenic sprouting of EC.** **A)** Pfn1 and tubulin (loading control) immunoblots HmVEC extracts 5 days after transfection with control or Pfn1 siRNA (5-day represents the end time-point of the parallel EC spheroid assay). **B-C)** Representative images (*panel B*) and quantification (*panel C*) of EC spheroid sprouting following treatment with either control or Pfn1 siRNA after 5 days (\*\*  $p < .01$ ). **D-E)** Representative images (*panel D*) and quantification (*panel E*) of aortic ring sprouting angiogenesis (in collagen-I) following treatment of aortic rings with either control or Pfn1-specific siRNA after 120 hours (vessels are identified by FITC lectin staining) (\*\*  $p < 0.01$ ; N indicates the number of independent experiments; in each experiment, aortic segments prepared from 1-2 mice was randomly distributed between the two groups). **F)** Genotyping confirmation of Pfn1<sup>+/-[EC]</sup> mice (Tie2-Cre-mediated excision of floxed Pfn1 allele gives rise to a 700 bp knockout (KO) band in EC; EC were harvested from aortic segments). **G-H)** Representative images (*panel G*) and quantification (*panel H*) of sprouting angiogenesis in matrigel from WT vs Pfn1<sup>+/-[EC]</sup> aortic segments (N: number of mice for each genotype; \*:  $p < 0.05$ ).

**Supplemental Figure S1.** Live/dead staining of HmVEC after treatment with either DMSO or CCG-1423 (10 M). Green depicts live cells and red (arrow) shows dead cells.

**Supplemental Figure S2.** Lectin and Pfn1 immunostaining of aortic rings treated with either control or Pfn1 siRNA (note that Pfn1-siRNA treated rings show an overall weaker staining Pfn1; white and yellow arrowheads depict sprouts with undetectable and intermediate levels of Pfn1).

Gau et al. Supplementary Fig S1

Live-dead stain of HmVEC

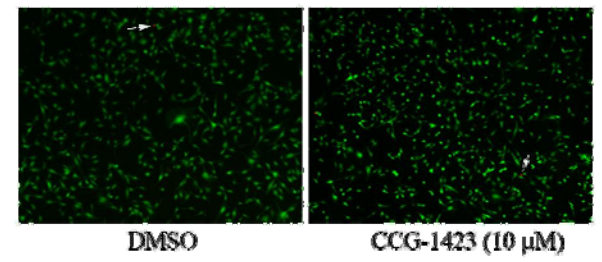

Supplement: NIHMS966609-supplement-supplement_1.pdf [file NIHMS966609-supplement-supplement_1.pdf]
